# Supplementary material for: Geographic information system data from ambulances applied in the emergency department: effects on patient reception
Source: Springer Nature journal article supplement (doi:10.1186/s13049-016-0232-5), 2016-03-30
Supplement: MOESM1 [file 10027948]

Appendix 1. GIS data web application, screenshot (English simulation)

A

| Type                                                                            | Amb  | Mobile / TETRA          | Level | ETA          | Dispatch code                                                            | Description                         | From/To address                                        | Primary notification                                                                                                                   | Name   | Surname  | PI number |
|---------------------------------------------------------------------------------|------|-------------------------|-------|--------------|--------------------------------------------------------------------------|-------------------------------------|--------------------------------------------------------|----------------------------------------------------------------------------------------------------------------------------------------|--------|----------|-----------|
|  | 3456 | M:51563518<br>T:5442090 | A     | Hand over OK | Traffic accident _possible high energy trauma                            |                                     | F:MTV S E45 M60 133<br>T: MHOR ED, entrance F (Closed) | Received from 1-1-2 14:06 Text: Site of damage: Two others with head pain. Everybody wearing safety belt. One car crashed into another | JENSEN | MOSE     | 21000000  |
|  | 3451 | M:51563514<br>T:5442070 | A     | Hand over OK | -                                                                        | Is in outpatient clinic no. 3       | F:MTV S E45 M60 133<br>T: MHOR ED, entrance F (Closed) | Received from 1-1-2 14:06 Text: Site of damage: Two other with head pain. Everybody wearing safety belt. One car crashed into another  |        |          |           |
|  | 3448 | M:5442060<br>T:5442061  | A     | Hand over OK | Planned transport _ Transport directly to hospital. Unstable vital signs | Possible MI. Previous heart disease | F:KIRKEGADE 18,ULDUM<br>T:MHOR M2                      | EMCC: 385 DISP: RM1047 Comm: Possible MI, previous heart disease no further Info. Prehospital physician on site                        | JENSEN | MOSEMOSE | 21000000  |

D

| Type                                                                            | Amb  | Mobile / TETRA          | Level | ETA                   | Dispatch code | Description                                         | From/To address                                          | Primary notification                                                                                                              | Name | Surname  | PI number |
|---------------------------------------------------------------------------------|------|-------------------------|-------|-----------------------|---------------|-----------------------------------------------------|----------------------------------------------------------|-----------------------------------------------------------------------------------------------------------------------------------|------|----------|-----------|
|  | 4166 | M:5446090<br>T:5446091  | D     | 132.4 min<br>110.3 km | -             | Phone ETA to Frederikshavn - 97641993               | F:FREDERIKSHAVN Hospital<br>T: MHOR ED                   | From dep. M2 4th floor. After admission in Frederikshavn, now further treatment on home hospital. Treated for Erysipelas and DVT. | MOSE | MOSEMOSE | 21000000  |
|  | 4159 | M:5446030<br>T:5446031  | D     | 18.2 min.<br>15.2 km  | -             | Pneumonia                                           | F:SPIREAVEJ 12,GALTEN<br>T: MHOR ED, entrance F (Closed) | EMCC: 385 DISP: RM5271 Comm: Pneumonia. D#                                                                                        | MOSE | MOSE     | 21000000  |
|  | 3443 | M:51563504<br>T:5442040 | D     | Pt. contact           | -             | Community nurse 22103686<br>Possibly bleeding ulcer | F:GAMMEL JERNBANEGADE 6,HORSENS<br>T:MHOR ED             | EMCC: 385 DISP: RM1015 Comm: Community nurse 22103686, possibly bleeding ulcer                                                    | MOSE | MOSEMOSE | 21000000  |

Type: Ambulance type; AMB: Ambulance number; Mobile/TETRA: Phone/radio number; Level: Level of urgency; ETA: Estimated Time of Arrival
