# Supplementary material for: Geographic information system data from ambulances applied in the emergency department: effects on patient reception
Source: Springer Nature journal article supplement (doi:10.1186/s13049-016-0232-5), 2016-03-30
Supplement: MOESM2 [file 10027948]

**Appendix 2 - Interview guide used for semi structured interviews with coordinating nurses (English translation)**

| Research question                                                                        | Interview questions                                                                                                                                                               | Elaborating questions                                                                                                                                                              |                                              |
|------------------------------------------------------------------------------------------|-----------------------------------------------------------------------------------------------------------------------------------------------------------------------------------|------------------------------------------------------------------------------------------------------------------------------------------------------------------------------------|----------------------------------------------|
| <p>How do coordinating nurses assess GIS data as a working tool?</p>                     | <p>How is GIS data used in the ED? Please give specific examples.</p>                                                                                                             | <p>a) What is the influence of GIS data on planning which nurse should receive the patient?<br/>b) What is the influence of GIS data on planning where to receive the patient?</p> | <p>Resource utilization</p>                  |
|                                                                                          | <p>Combined with an exercise with picture of screenshot depicting the GIS-application.</p> <p>What do you see from this picture and how do you use the different information?</p> | <p>c) Is GIS data useable in determining when MET or TT should be activated?</p>                                                                                                   |                                              |
|                                                                                          | <p>Are there any advantages/disadvantages by using GIS data? Keep discussing till it is clear where you agree or disagree.</p>                                                    | <p>a) Does TT or MET show up later in the ED?</p>                                                                                                                                  | <p>Quality of patient reception/handling</p> |
|                                                                                          | <p>Has implementation of GIS data changed working routines? What did you do before? Please give examples.</p>                                                                     | <p>b) Is reception of the patient improved? Does the patient meet the right competence faster?</p>                                                                                 |                                              |
|                                                                                          | <p>What is the most and the least useful about GIS data?</p>                                                                                                                      |                                                                                                                                                                                    |                                              |
|                                                                                          | <p>You have told how you use GIS data, but could it be utilized in other ways?</p>                                                                                                |                                                                                                                                                                                    |                                              |
| <p>How does the use of GIS data influence work environment, according to the nurses?</p> | <p>Has GIS data influenced you work environment? Keep discussing till it is clear where you agree or disagree.</p>                                                                | <p>a) When working as coordination nurse, is the level of stress influenced? If yes, how?<br/>b) Is the teamwork in the department?</p>                                            | <p>Work environment</p>                      |
| <p>How is the design of the GIS-application evaluated by the nurses?</p>                 | <p>Have you experienced inaccurate or wrong information? Please give examples.</p>                                                                                                | <p>a) What implications could it have?</p>                                                                                                                                         |                                              |
|                                                                                          | <p>Are there any information you are missing or ways the application could be improved?</p>                                                                                       |                                                                                                                                                                                    |                                              |
